# Supplementary material
Source: publisher site journal article supplement (https://www.dovepress.com/article/supplementary_file/554324/554324%20Supplementary%20Material.docx)
Supplement: Supplementary file 1 [file 554324%20Supplementary%20Material.docx]

Supplementary Material

1 Supplementary Tables

Supplementary Table S1. Main ingredients of Compound Qingdai Capsule

| Compound Name | PubChem CID | Compound Name | PubChem CID |
| --- | --- | --- | --- |
| Caffeic acid | 689043 | 2-Isopropylmalic acid | 77 |
| Quinic acid | 6508 | Gallic acid | 370 |
| Astilbin | 119258 | Shikimic Acid | 8742 |
| o-Coumaric acid | 637540 | Orsellinic acid | 68072 |
| Medicarpin | 336327 | 3-Hydroxybenzoic acid | 7420 |
| Imperatorin | 10212 | Quercetin | 5280343 |
| Limonin | 179651 | Luteolin | 5280445 |
| 8-Methoxypsoralen | 4114 | Suberosin | 68486 |
| 7-Demethylsuberosin | 5316525 | Cryptotanshinone | 160254 |
| Salvianolic acid A | 5281793 | Bergapten | 2355 |
| Engeletin | 6453452 | Skimmianine | 6760 |
| Phellopterin | 98608 | Taxifolin 7-rhamnoside | 5070785 |
| Rosmarinic acid | 5281792 | Indirubin | 10177 |
| Trigonelline HCl | 5571 | Shikonin | 479503 |
| Isoimperatorin | 68081 |  |  |

Supplementary Table S2. The main active ingredients of PSORI-CM01

| Compound Name | PubChem CID | Compound Name | PubChem CID |
| --- | --- | --- | --- |
| Zederone | 101286196 | Rosmarinic acid | 5281792 |
| Cedar acid | 10742 | Isofraxidin | 5318565 |
| Octahydrocurcumin | 11068834 | p-Coumaric acid | 637542 |
| Paeonol | 11092 | Isoliquiritigenin | 638278 |
| Liquiritigenin | 114829 | Lithospermic acid | 6441498 |
| Salvianolic acid B | 11629084 | Isoliquiritin apioside | 6442433 |
| Astilbin | 119258 | Methyl Rosmarinate | 6479915 |
| Chlorogenic Acid | 1794427 | Caffeic Acid | 689043 |
| 5-Hydroxymethylfurfural | 237332 | Protocatehuic acid | 72 |
| Isoastilbin | 316844 | Syringaldehyde | 8655 |
| Gallic Acid | 370 | Cianidanol | 9064 |
| Taxifolin | 439533 | Naringetol | 932 |
| Fraxin | 5273568 | Cryptochlorogenic acid | 9798666 |

Supplementary Table S3. The main differential metabolites between BHS and BSS psoriasis

| Compound | Healthy Controls  (HC) | Blood-stasis  (BS) | Blood-heat  (BH) | Log2FC  (BS-BH) | p-value  (BH-BS) |
| --- | --- | --- | --- | --- | --- |
| Platelet-activating factor | 2246093.4 | 11976831.8 | 5490761.1 | 1.125168279 | 1.11E-08 |
| LysoPC (16:0/0:0) | 6182209.8 | 25003664 | 14035932.2 | 0.833014637 | 8.34E-08 |
| LysoPC (18:2/0:0) | 1445432.9 | 5521910.3 | 2411891.9 | 1.195002205 | 9.27E-10 |
| LysoPC (18:1/0:0) | 851522.5 | 5224404.5 | 2002867.3 | 1.383199763 | 1.57E-09 |
| LysoPC (20:1(11Z)) | 11377.7 | 99616.8 | 31071.8 | 1.680783248 | 2.17E-08 |
| LysoPC (20:4(5Z,8Z,11Z,14Z)) | 246759.4 | 1507810.6 | 515566.2 | 1.548225629 | 2.69E-11 |
| PC (18:3/18:1(9Z)) | 19582001.2 | 7138120.1 | 12121713.1 | -0.763977522 | 0.00231 |
| PC (20:4/18:0) | 6246531.3 | 786462.4 | 1442652.9 | -0.875274533 | 0.03524 |

Supplementary Table S4. Basic information on the enrichment pathways of CQC

| ID | Pathway | Targets | FDR |
| --- | --- | --- | --- |
| hsa05418 | Fluid shear stress and atherosclerosis | 22 | 1.47E-13 |
| hsa05235 | PD-L1 expression and PD-1 checkpoint pathway in cancer | 18 | 6.05E-13 |
| hsa05417 | Lipid and atherosclerosis | 24 | 3.34E-12 |
| hsa01521 | EGFR tyrosine kinase inhibitor resistance | 16 | 1.25E-11 |
| hsa04931 | Insulin resistance | 17 | 9.47E-11 |
| hsa04066 | HIF-1 signaling pathway | 17 | 9.97E-11 |
| hsa04151 | PI3K-Akt signaling pathway | 27 | 3.59E-10 |
| hsa04917 | Prolactin signaling pathway | 14 | 3.59E-10 |
| hsa04660 | T cell receptor signaling pathway | 16 | 3.40E-09 |
| hsa04668 | TNF signaling pathway | 15 | 1.30E-08 |
| hsa04014 | Ras signaling pathway | 20 | 2.00E-08 |
| hsa04620 | Toll-like receptor signaling pathway | 14 | 5.02E-08 |
| hsa04722 | Neurotrophin signaling pathway | 14 | 1.53E-07 |
| hsa04926 | Relaxin signaling pathway | 14 | 3.47E-07 |
| hsa04659 | Th17 cell differentiation | 13 | 3.63E-07 |
| hsa04068 | FoxO signaling pathway | 14 | 3.84E-07 |
| hsa04915 | Estrogen signaling pathway | 14 | 6.19E-07 |
| hsa04370 | VEGF signaling pathway | 10 | 8.35E-07 |
| hsa04630 | JAK-STAT signaling pathway | 15 | 8.35E-07 |
| hsa04935 | Growth hormone synthesis, secretion and action | 13 | 9.55E-07 |
| hsa04510 | Focal adhesion | 16 | 1.61E-06 |
| hsa04012 | ErbB signaling pathway | 11 | 1.95E-06 |
| hsa04010 | MAPK signaling pathway | 19 | 2.37E-06 |
| hsa04380 | Osteoclast differentiation | 13 | 2.85E-06 |
| hsa04071 | Sphingolipid signaling pathway | 12 | 5.80E-06 |
| hsa04015 | Rap1 signaling pathway | 15 | 9.92E-06 |
| hsa04621 | NOD-like receptor signaling pathway | 14 | 1.23E-05 |
| hsa04664 | Fc epsilon RI signaling pathway | 9 | 1.80E-05 |
| hsa04024 | cAMP signaling pathway | 14 | 7.26E-05 |
| hsa04910 | Insulin signaling pathway | 11 | 7.83E-05 |
| hsa04658 | Th1 and Th2 cell differentiation | 9 | 1.23E-04 |
| hsa04072 | Phospholipase D signaling pathway | 11 | 1.40E-04 |
| hsa04657 | IL-17 signaling pathway | 9 | 1.41E-04 |
| hsa04919 | Thyroid hormone signaling pathway | 10 | 1.47E-04 |
| hsa04064 | NF-kappa B signaling pathway | 9 | 2.63E-04 |
| hsa04662 | B cell receptor signaling pathway | 8 | 3.90E-04 |
| hsa04020 | Calcium signaling pathway | 13 | 6.87E-04 |
| hsa04152 | AMPK signaling pathway | 9 | 6.87E-04 |
| hsa04611 | Platelet activation | 9 | 7.93E-04 |
| hsa04150 | mTOR signaling pathway | 10 | 8.28E-04 |
| hsa04115 | p53 signaling pathway | 6 | 0.006055149 |
| hsa04371 | Apelin signaling pathway | 8 | 0.006240951 |
| hsa03320 | PPAR signaling pathway | 7 | 0.006407412 |
| hsa04928 | Parathyroid hormone synthesis, secretion and action | 7 | 0.006409106 |
| hsa04610 | Complement and coagulation cascades | 6 | 0.011278073 |
| hsa04912 | GnRH signaling pathway | 5 | 0.015433437 |

Supplementary Table S5. Basic information on the enrichment pathways of PSORI-CM01

| ID | Pathway | Targets | FDR |
| --- | --- | --- | --- |
| hsa04066 | HIF-1 signaling pathway | 16 | 4.43E-12 |
| hsa01521 | EGFR tyrosine kinase inhibitor resistance | 13 | 2.34E-10 |
| hsa04917 | Prolactin signaling pathway | 12 | 1.05E-09 |
| hsa05418 | Fluid shear stress and atherosclerosis | 14 | 8.67E-09 |
| hsa05235 | PD-L1 expression and PD-1 checkpoint pathway in cancer | 12 | 8.88E-09 |
| hsa05417 | Lipid and atherosclerosis | 16 | 1.86E-08 |
| hsa04926 | Relaxin signaling pathway | 12 | 2.98E-07 |
| hsa04151 | PI3K-Akt signaling pathway | 18 | 3.41E-07 |
| hsa04915 | Estrogen signaling pathway | 12 | 5.03E-07 |
| hsa04931 | Insulin resistance | 11 | 5.03E-07 |
| hsa04919 | Thyroid hormone signaling pathway | 11 | 1.25E-06 |
| hsa04014 | Ras signaling pathway | 14 | 1.83E-06 |
| hsa04068 | FoxO signaling pathway | 11 | 2.08E-06 |
| hsa04510 | Focal adhesion | 13 | 2.09E-06 |
| hsa04015 | Rap1 signaling pathway | 13 | 2.78E-06 |
| hsa04370 | VEGF signaling pathway | 8 | 4.84E-06 |
| hsa04935 | Growth hormone synthesis, secretion and action | 10 | 6.79E-06 |
| hsa04630 | JAK-STAT signaling pathway | 11 | 1.22E-05 |
| hsa04620 | Toll-like receptor signaling pathway | 9 | 2.52E-05 |
| hsa04668 | TNF signaling pathway | 9 | 3.61E-05 |
| hsa04012 | ErbB signaling pathway | 8 | 4.25E-05 |
| hsa04722 | Neurotrophin signaling pathway | 9 | 4.59E-05 |
| hsa04071 | Sphingolipid signaling pathway | 9 | 5.10E-05 |
| hsa04910 | Insulin signaling pathway | 9 | 1.15E-04 |
| hsa04660 | T cell receptor signaling pathway | 8 | 3.21E-04 |
| hsa04152 | AMPK signaling pathway | 8 | 3.21E-04 |
| hsa04611 | Platelet activation | 8 | 3.64E-04 |
| hsa04380 | Osteoclast differentiation | 8 | 5.81E-04 |
| hsa04664 | Fc epsilon RI signaling pathway | 6 | 8.31E-04 |
| hsa04062 | Chemokine signaling pathway | 9 | 8.85E-04 |
| hsa04150 | mTOR signaling pathway | 8 | 0.001222574 |
| hsa04662 | B cell receptor signaling pathway | 6 | 0.001914013 |
| hsa04024 | cAMP signaling pathway | 9 | 0.002159523 |
| hsa04010 | MAPK signaling pathway | 10 | 0.00345682 |
| hsa04072 | Phospholipase D signaling pathway | 7 | 0.004081952 |
| hsa04659 | Th17 cell differentiation | 6 | 0.005033309 |
| hsa04920 | Adipocytokine signaling pathway | 5 | 0.005603803 |
| hsa04115 | p53 signaling pathway | 5 | 0.006923592 |
| hsa04371 | Apelin signaling pathway | 6 | 0.013198593 |
| hsa04928 | Parathyroid hormone synthesis, secretion and action | 5 | 0.021628622 |

Supplementary Table S6. Top50 topological parameters of target genes of CQC in treating psoriasis

| Gene | Degree | Betweenness  Centrality | Gene | Degree | Betweenness  Centrality | Gene | Degree | Betweenness  Centrality |
| --- | --- | --- | --- | --- | --- | --- | --- | --- |
| TNF | 99 | 0.122 | MTOR | 50 | 0.007 | PPARA | 35 | 0.019 |
| AKT1 | 92 | 0.101 | PTPRC | 50 | 0.010 | CCR2 | 34 | 0.008 |
| ALB | 81 | 0.068 | JAK2 | 50 | 0.024 | NOS3 | 34 | 0.002 |
| STAT3 | 77 | 0.030 | GSK3B | 47 | 0.020 | FLT3 | 33 | 0.003 |
| EGFR | 74 | 0.029 | VCAM1 | 47 | 0.007 | SELE | 33 | 0.005 |
| MMP9 | 73 | 0.031 | IGF1R | 46 | 0.003 | CTSB | 32 | 0.004 |
| BCL2 | 69 | 0.021 | MAPK14 | 46 | 0.011 | JAK1 | 32 | 0.002 |
| TLR4 | 68 | 0.030 | SIRT1 | 44 | 0.004 | ARG1 | 31 | 0.002 |
| CASP3 | 67 | 0.017 | MAPK8 | 44 | 0.012 | CDK4 | 31 | 0.005 |
| PPARG | 62 | 0.024 | MDM2 | 41 | 0.003 | SELP | 31 | 0.007 |
| ESR1 | 60 | 0.029 | APP | 41 | 0.018 | CDK2 | 31 | 0.005 |
| KDR | 58 | 0.021 | PARP1 | 40 | 0.002 | PLAU | 31 | 0.003 |
| HSP90AA1 | 55 | 0.025 | PIK3CA | 40 | 0.002 | RPS6KB1 | 30 | 0.001 |
| ICAM1 | 55 | 0.016 | PGR | 39 | 0.009 | PLG | 30 | 0.004 |
| MMP2 | 54 | 0.007 | SERPINE1 | 38 | 0.006 | NTRK1 | 30 | 0.002 |
| STAT1 | 54 | 0.010 | PTPN11 | 38 | 0.016 | ESR2 | 29 | 0.004 |
| MAPK1 | 51 | 0.028 | FLT1 | 35 | 0.002 |  |  |  |

Supplementary Table S7. Top50 topological parameters of target genes of PSORI-CM01 in treating psoriasis

| Gene | Degree | Betweenness  Centrality | Gene | Degree | Betweenness  Centrality | Gene | Degree | Betweenness  Centrality |
| --- | --- | --- | --- | --- | --- | --- | --- | --- |
| AKT1 | 59 | 0.072 | IGF1R | 30 | 0.005 | TLR9 | 19 | 0.005 |
| GAPDH | 57 | 0.134 | PGR | 29 | 0.015 | LGALS3 | 18 | 0.002 |
| EGFR | 53 | 0.070 | SERPINE1 | 28 | 0.012 | ABCG2 | 18 | 0.001 |
| MMP9 | 49 | 0.040 | PIK3CA | 28 | 0.004 | FLT3 | 18 | 0.002 |
| STAT3 | 47 | 0.025 | PPARA | 25 | 0.004 | PIK3CB | 18 | 0.001 |
| PPARG | 45 | 0.054 | CYP3A4 | 24 | 0.039 | ADAM17 | 17 | 0.002 |
| BCL2 | 44 | 0.023 | APP | 24 | 0.015 | SELP | 16 | 0.008 |
| ESR1 | 44 | 0.085 | CTSB | 23 | 0.004 | ELANE | 16 | 0.002 |
| TLR4 | 43 | 0.045 | ESR2 | 23 | 0.014 | PTPN1 | 15 | 0.003 |
| MMP2 | 37 | 0.014 | SLC2A1 | 22 | 0.006 | AURKA | 14 | 0.001 |
| KDR | 36 | 0.017 | NFE2L2 | 22 | 0.002 | PPARD | 14 | 0.000 |
| GSK3B | 36 | 0.030 | ABCB1 | 21 | 0.007 | NOS2 | 14 | 0.001 |
| MTOR | 35 | 0.008 | ARG1 | 21 | 0.004 | PIK3CD | 14 | 0.000 |
| CCND1 | 34 | 0.009 | CDK4 | 21 | 0.006 | MMP12 | 13 | 0.001 |
| MAPK14 | 32 | 0.015 | CDK2 | 21 | 0.007 | CTSL | 13 | 0.001 |
| STAT1 | 32 | 0.009 | PTGS1 | 20 | 0.031 | COMT | 12 | 0.009 |
| MAPK1 | 31 | 0.040 | SELE | 20 | 0.008 |  |  |  |

2 Supplementary Figures


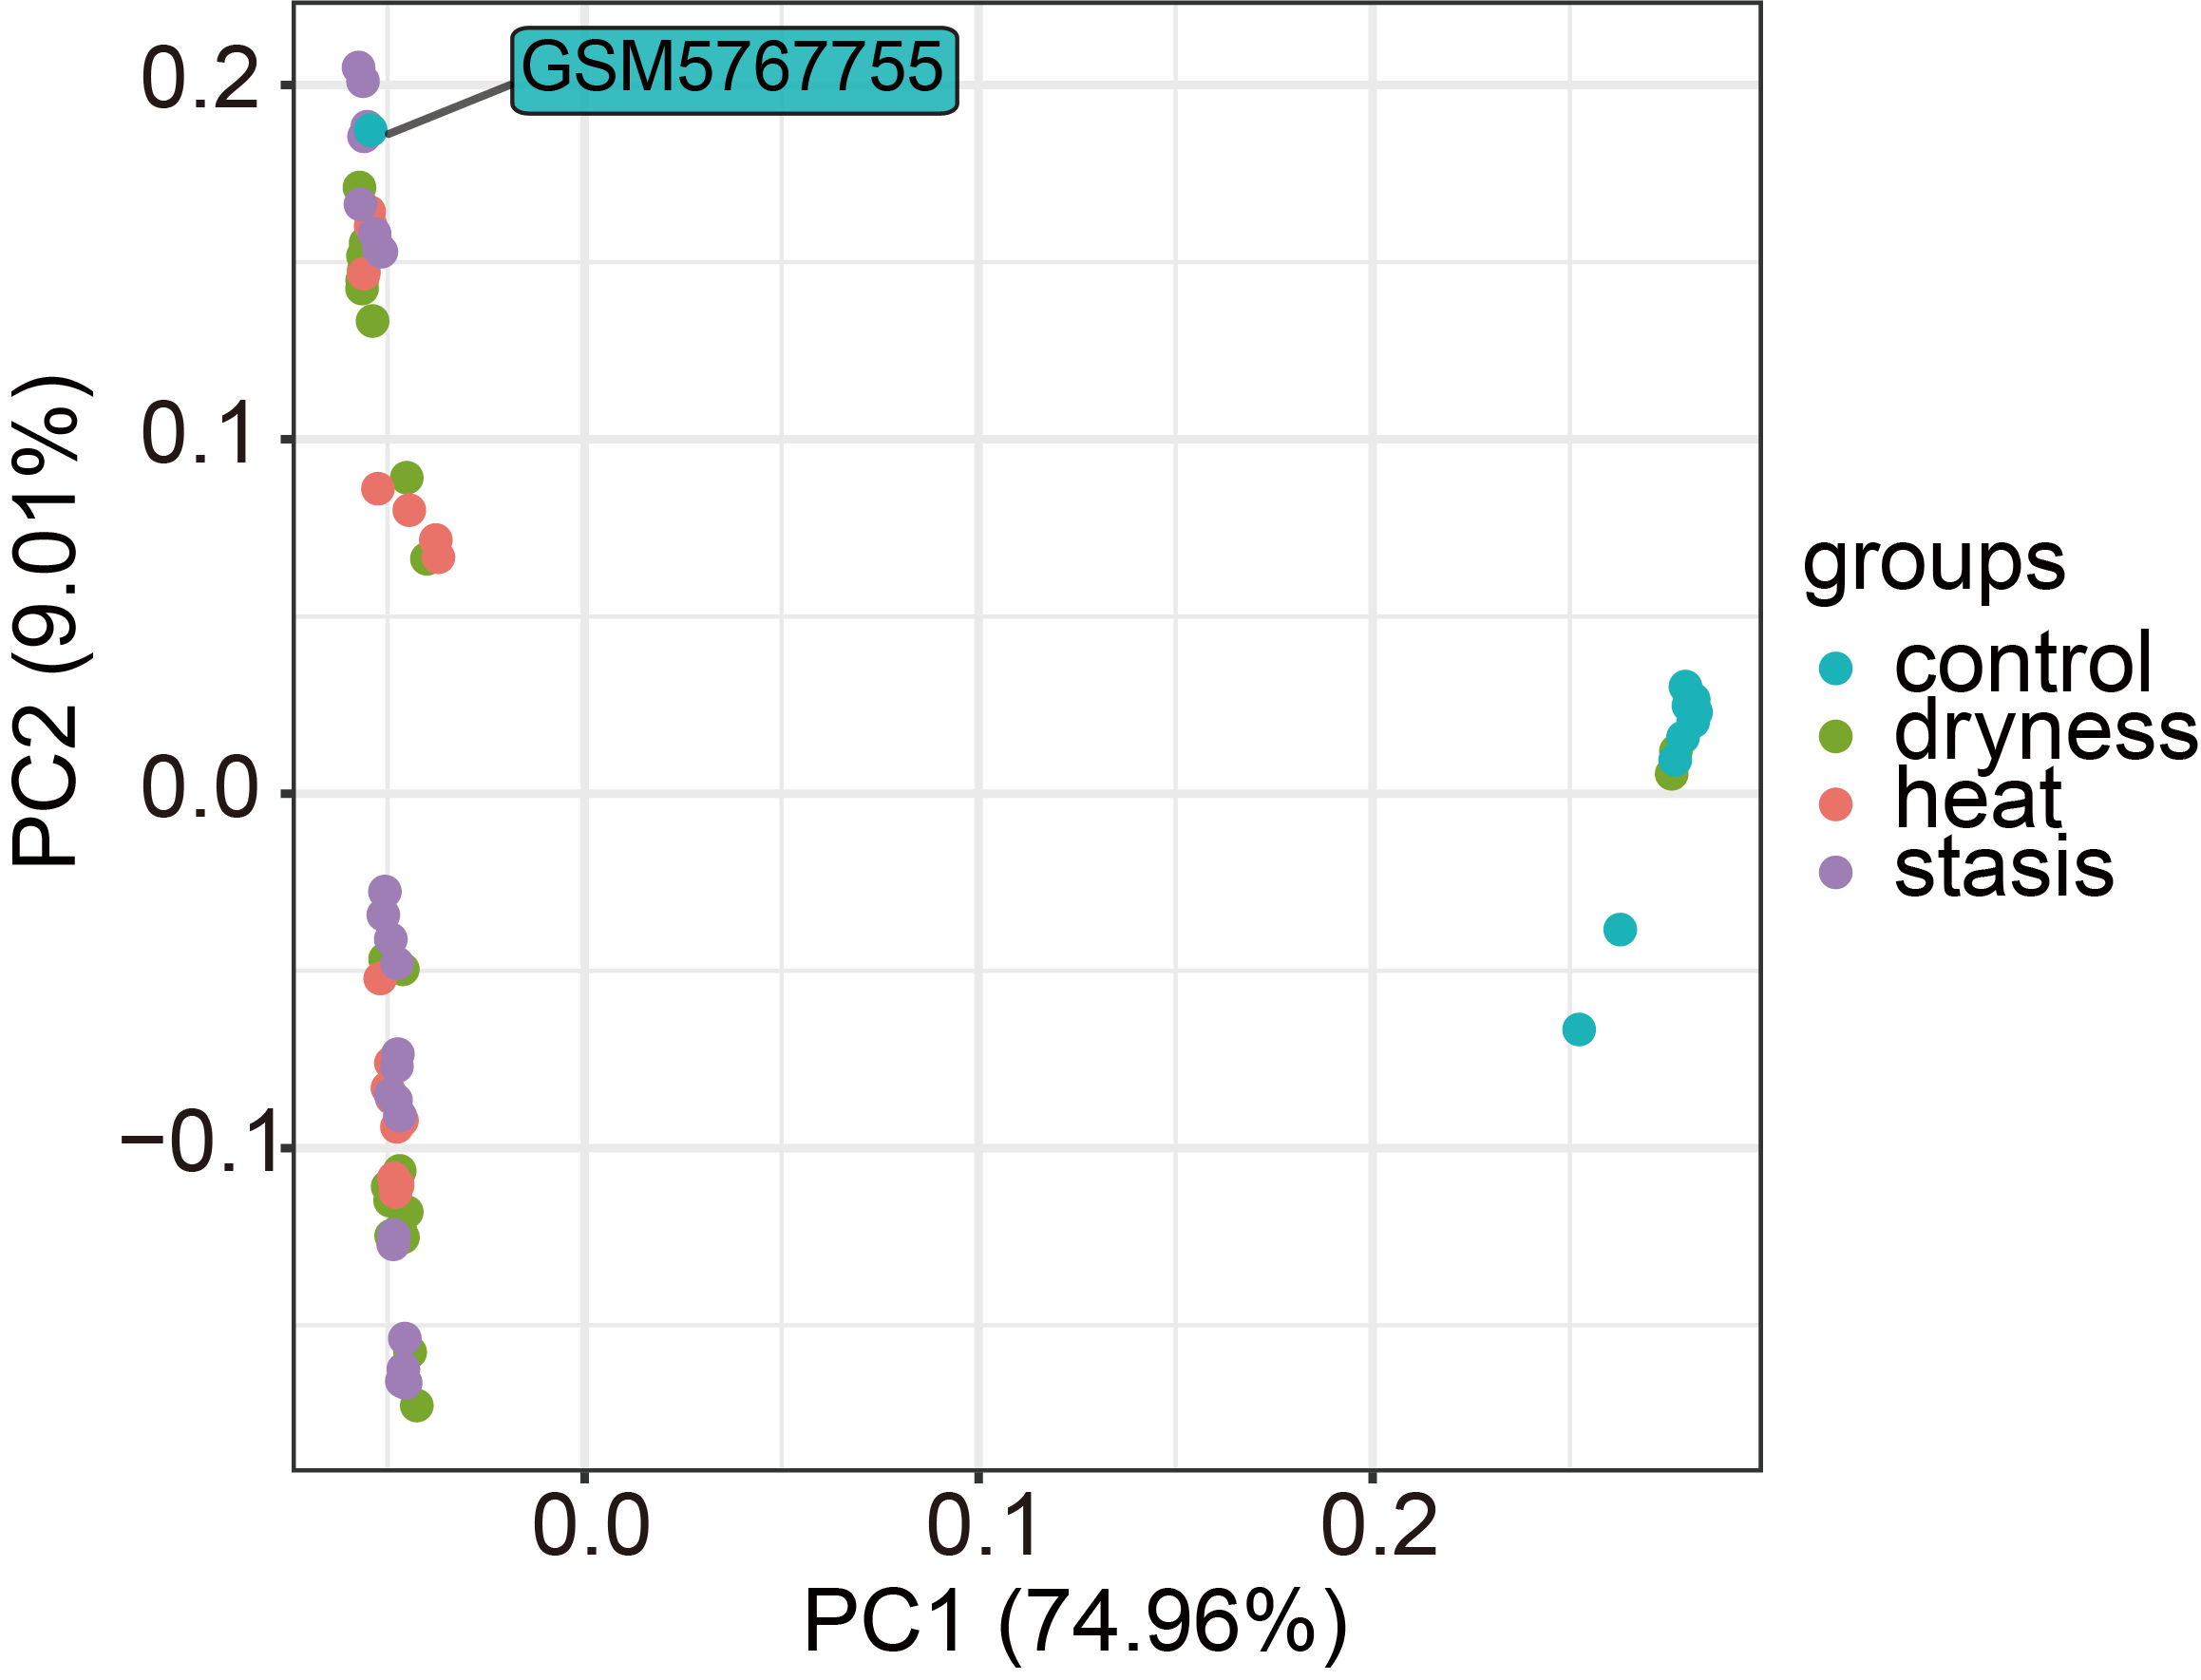


Supplementary Figure S1: Principal component analysis diagram of RNA sequencing data for psoriasis (GSE192867).


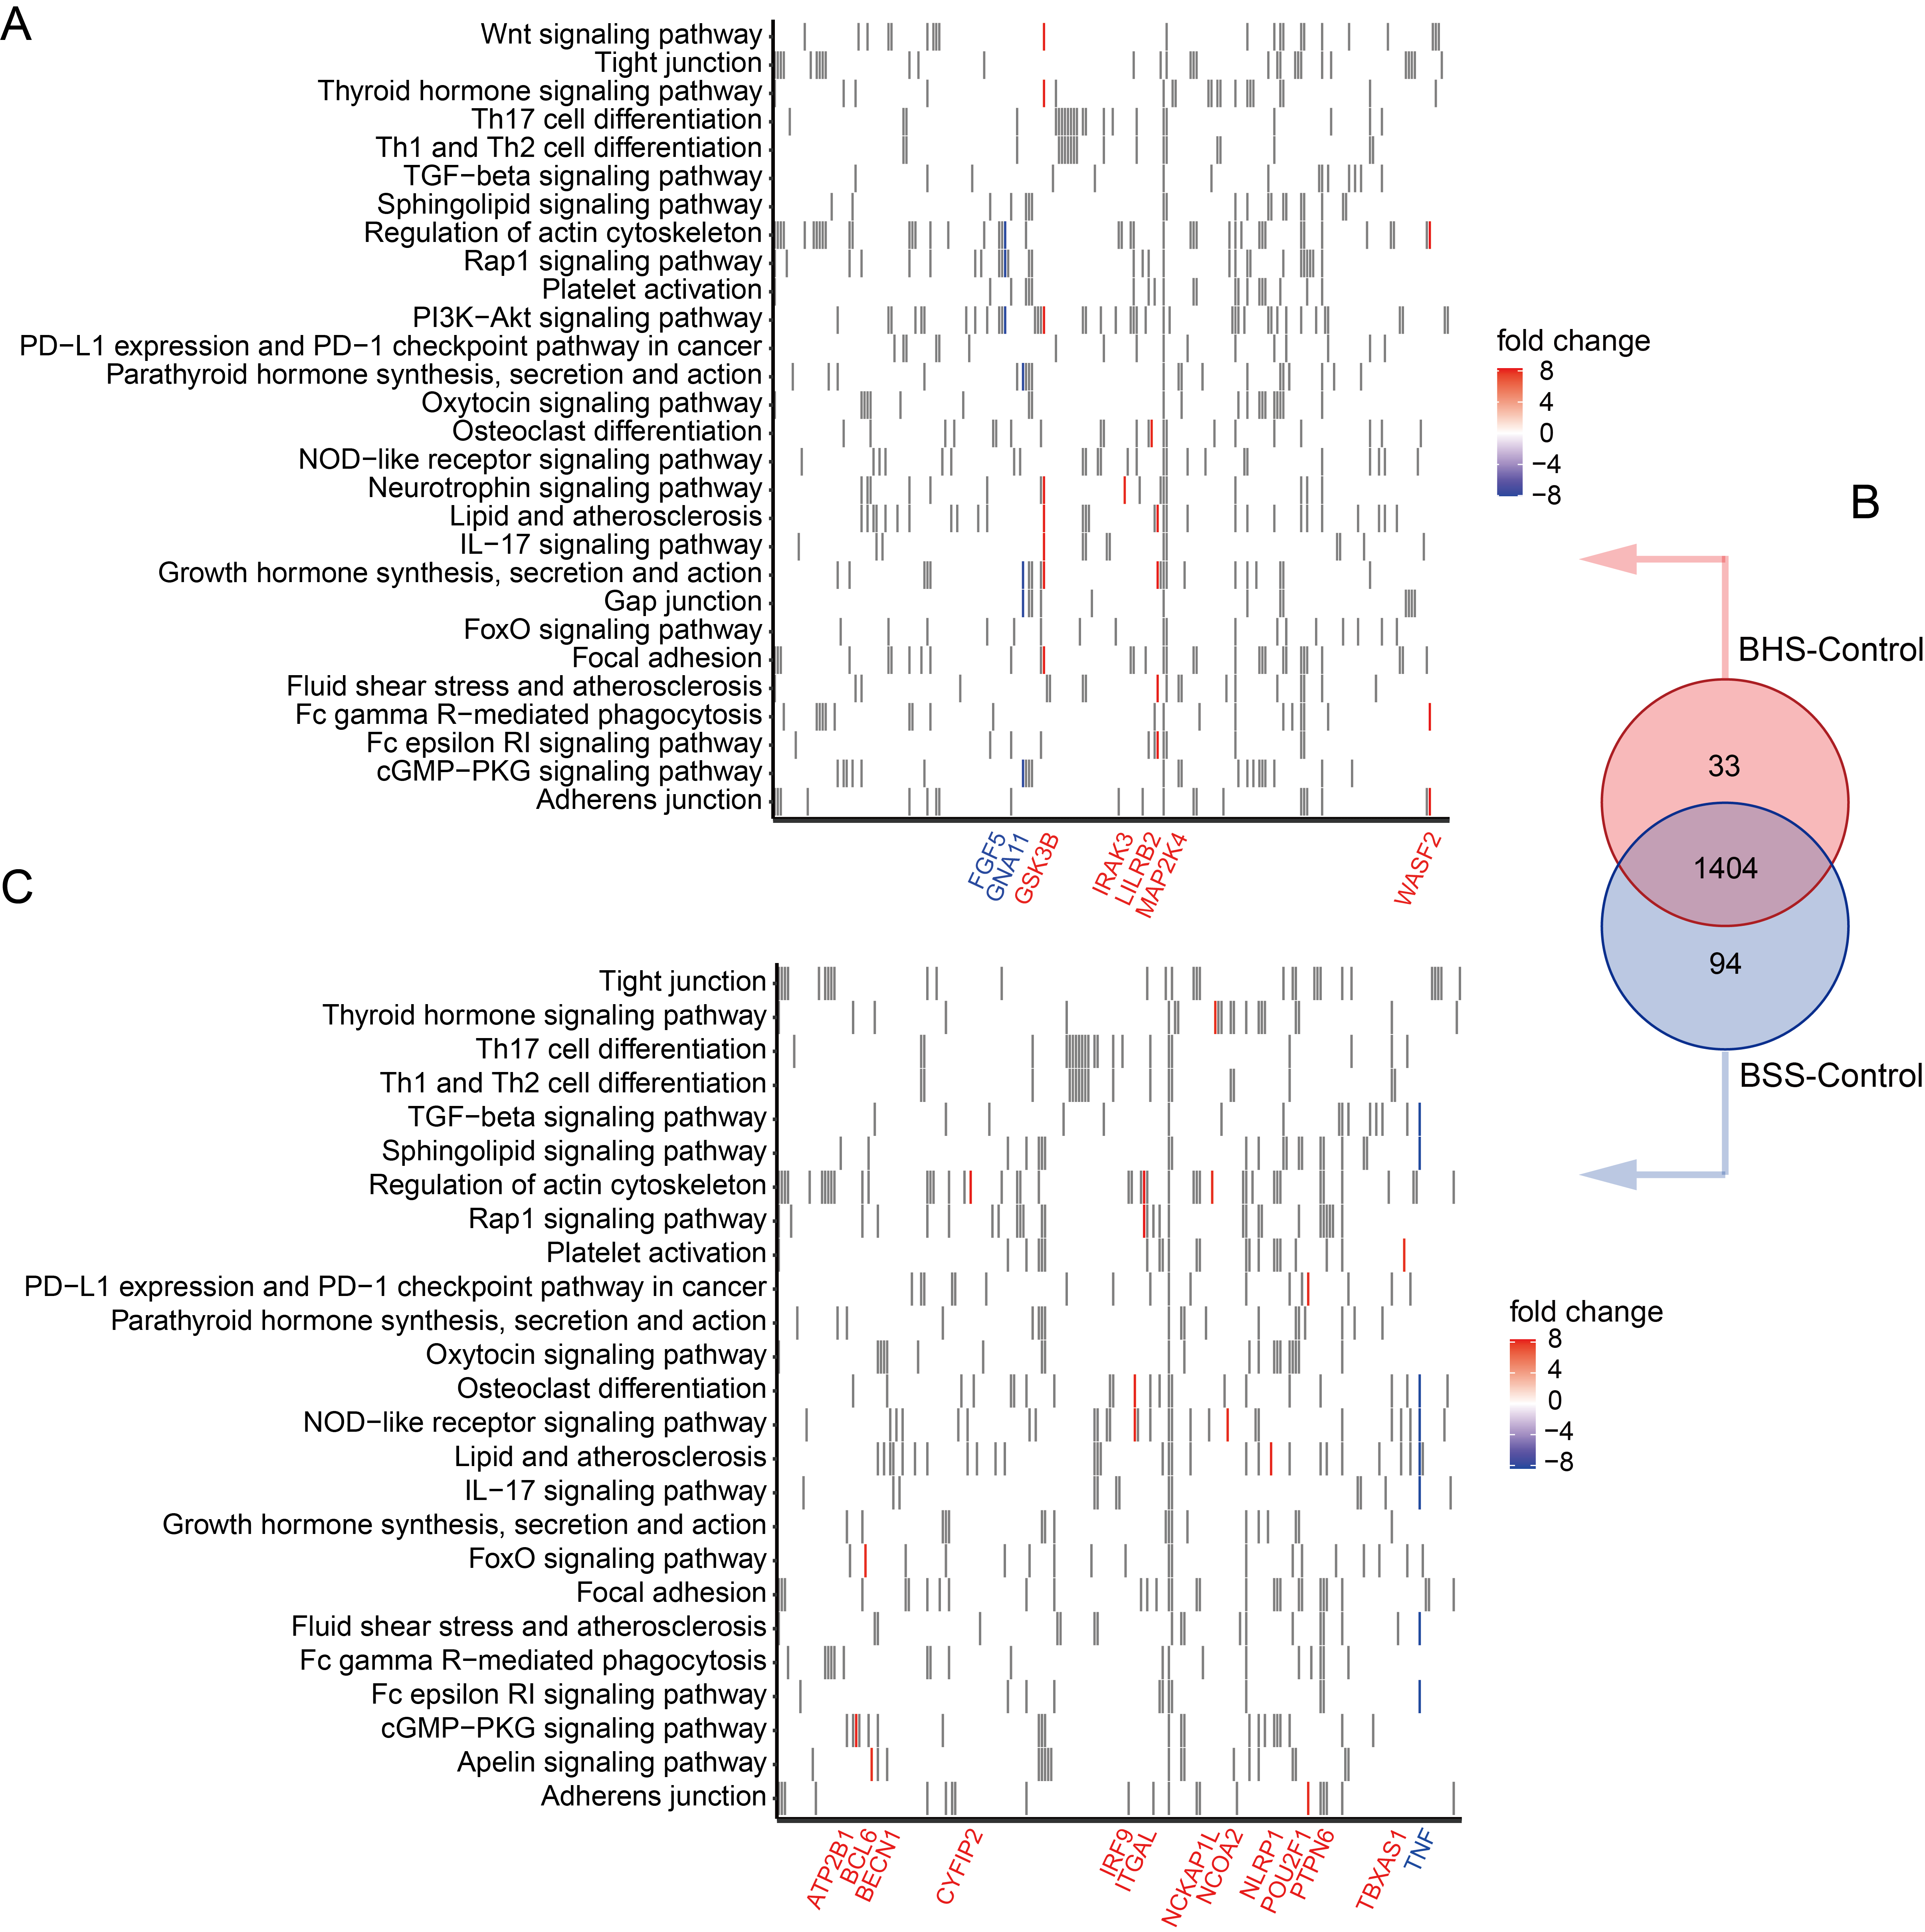


Supplementary Figure S2: Heatmaps and Venn chart for the gene expression profile. (A) Heatmap of specific differential genes and pathways enrichment in BHS psoriasis. (B) Venn diagram of differential genes in psoriasis with BHS and BSS. (C) Heatmap of specific differential genes and pathways enrichment in BSS psoriasis.


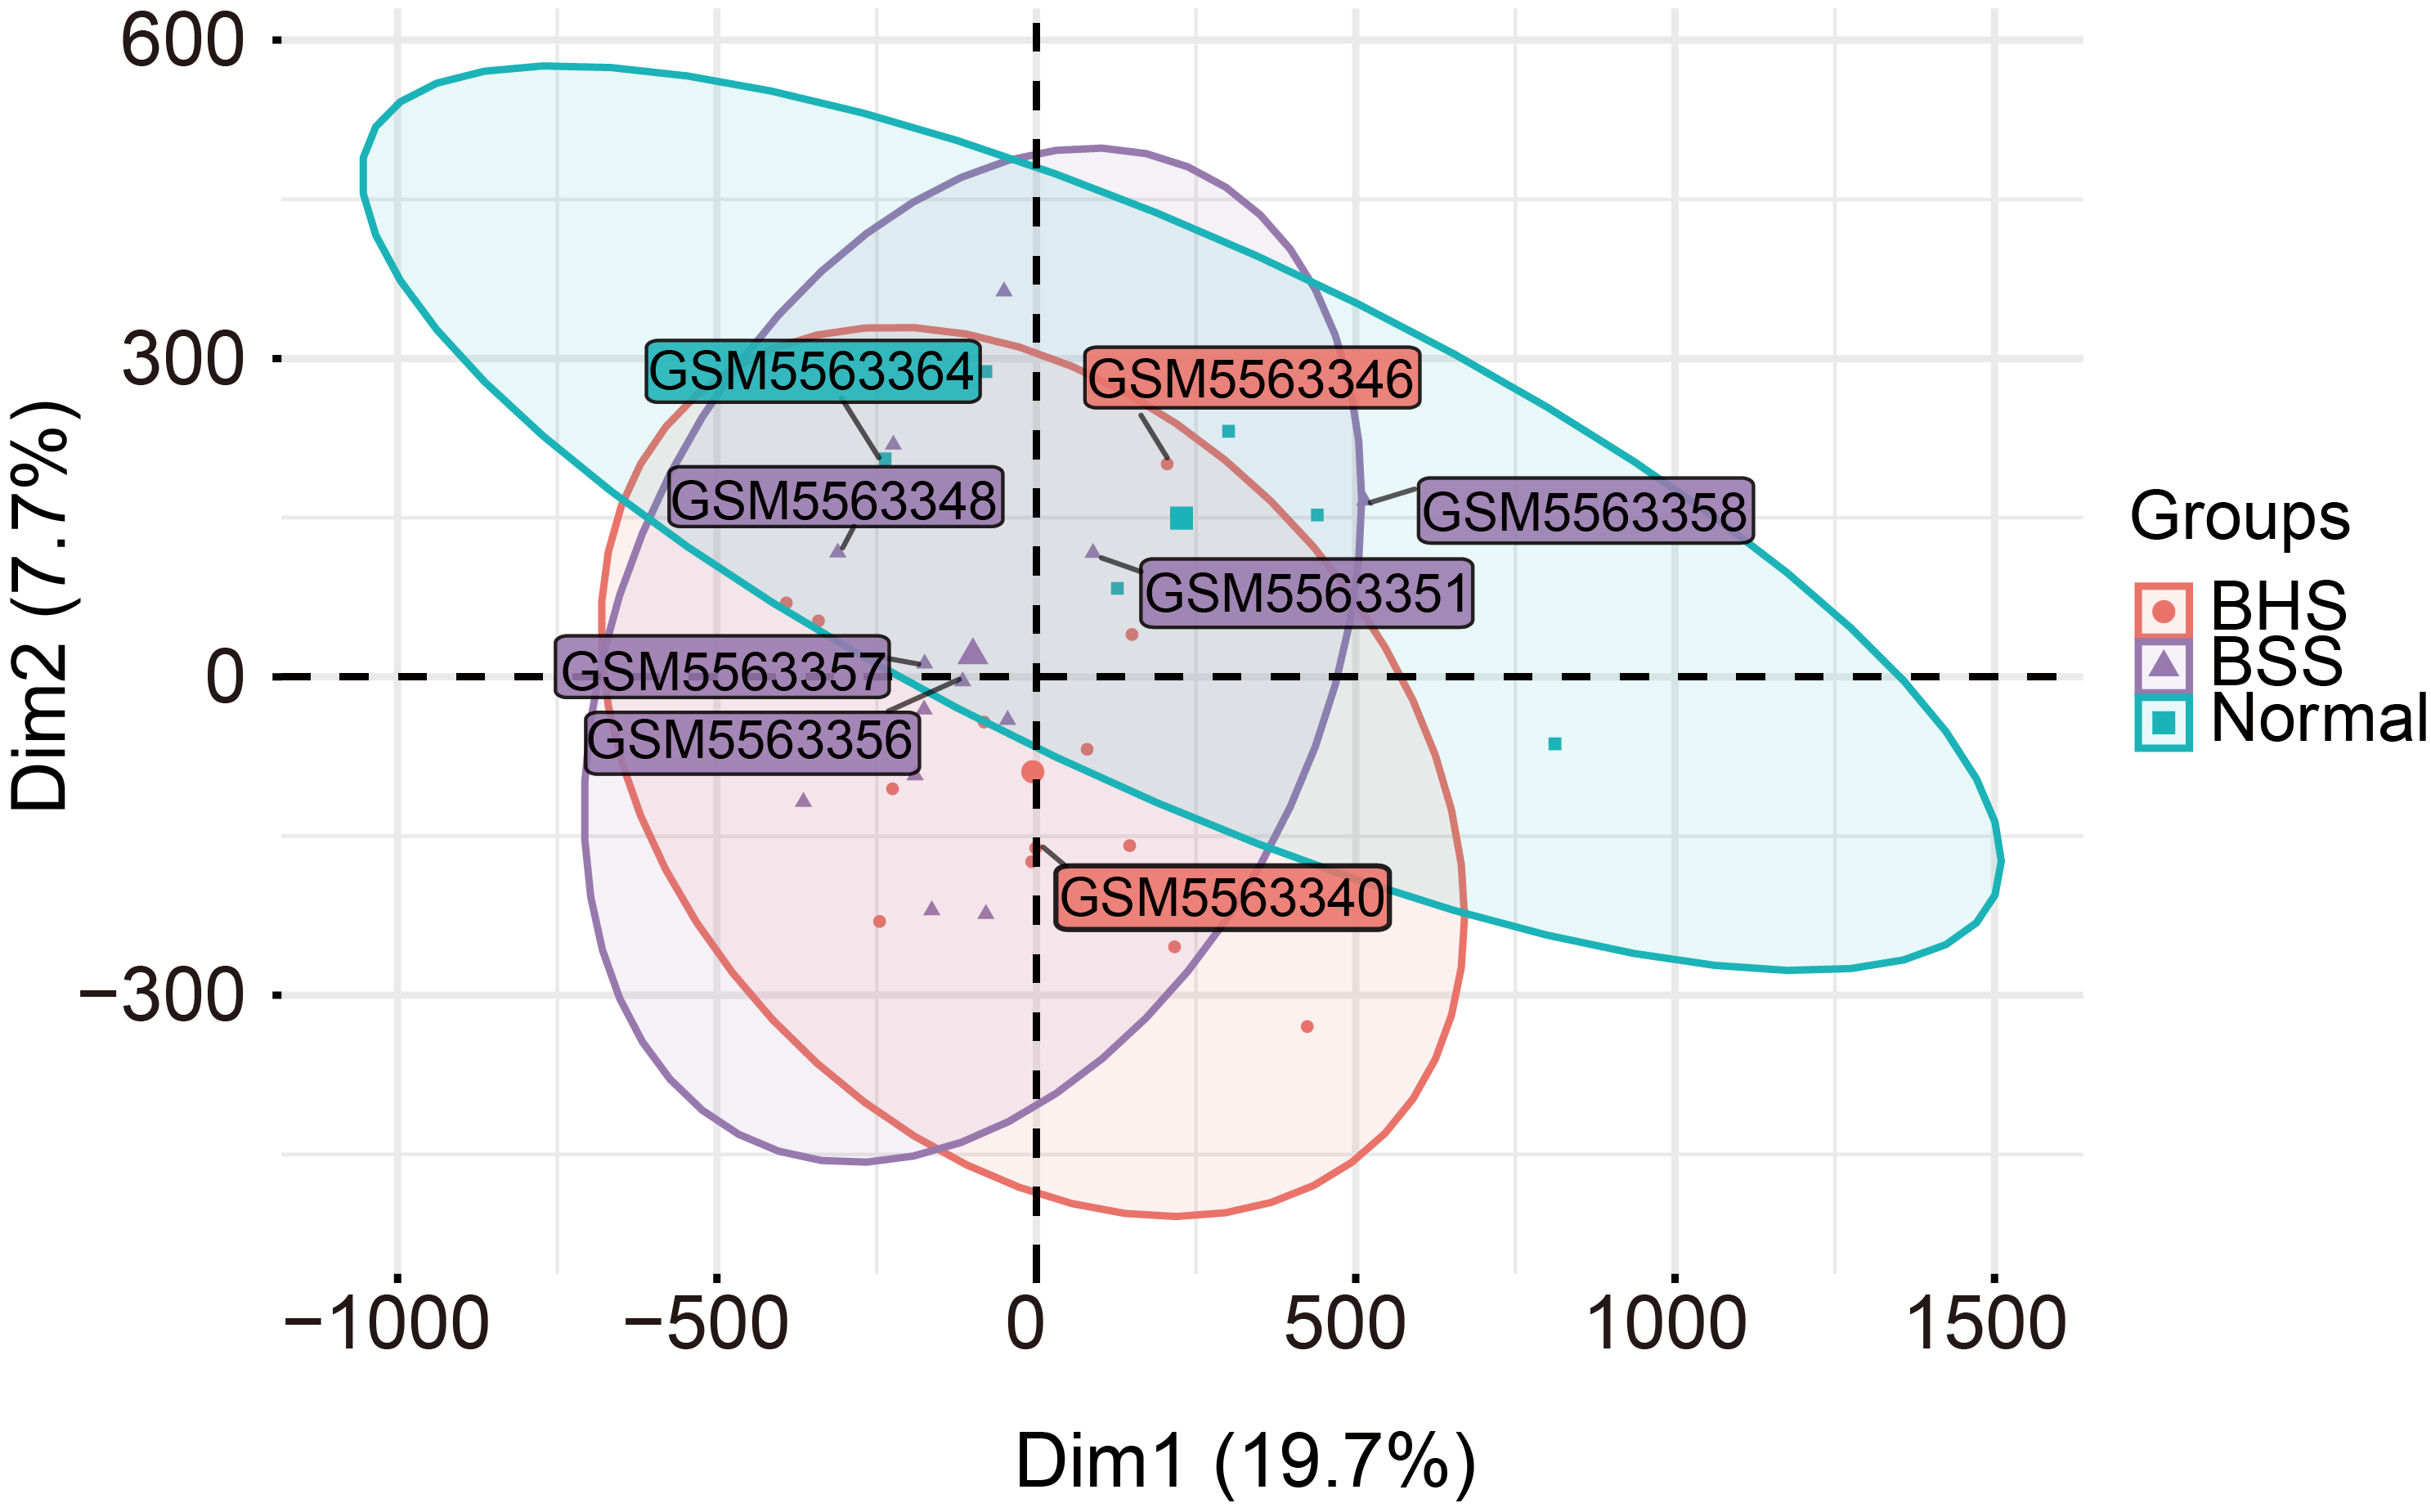


Supplementary Figure S3: Principal component analysis diagram of DNA methylation expression profiles for psoriasis (GSE183608).


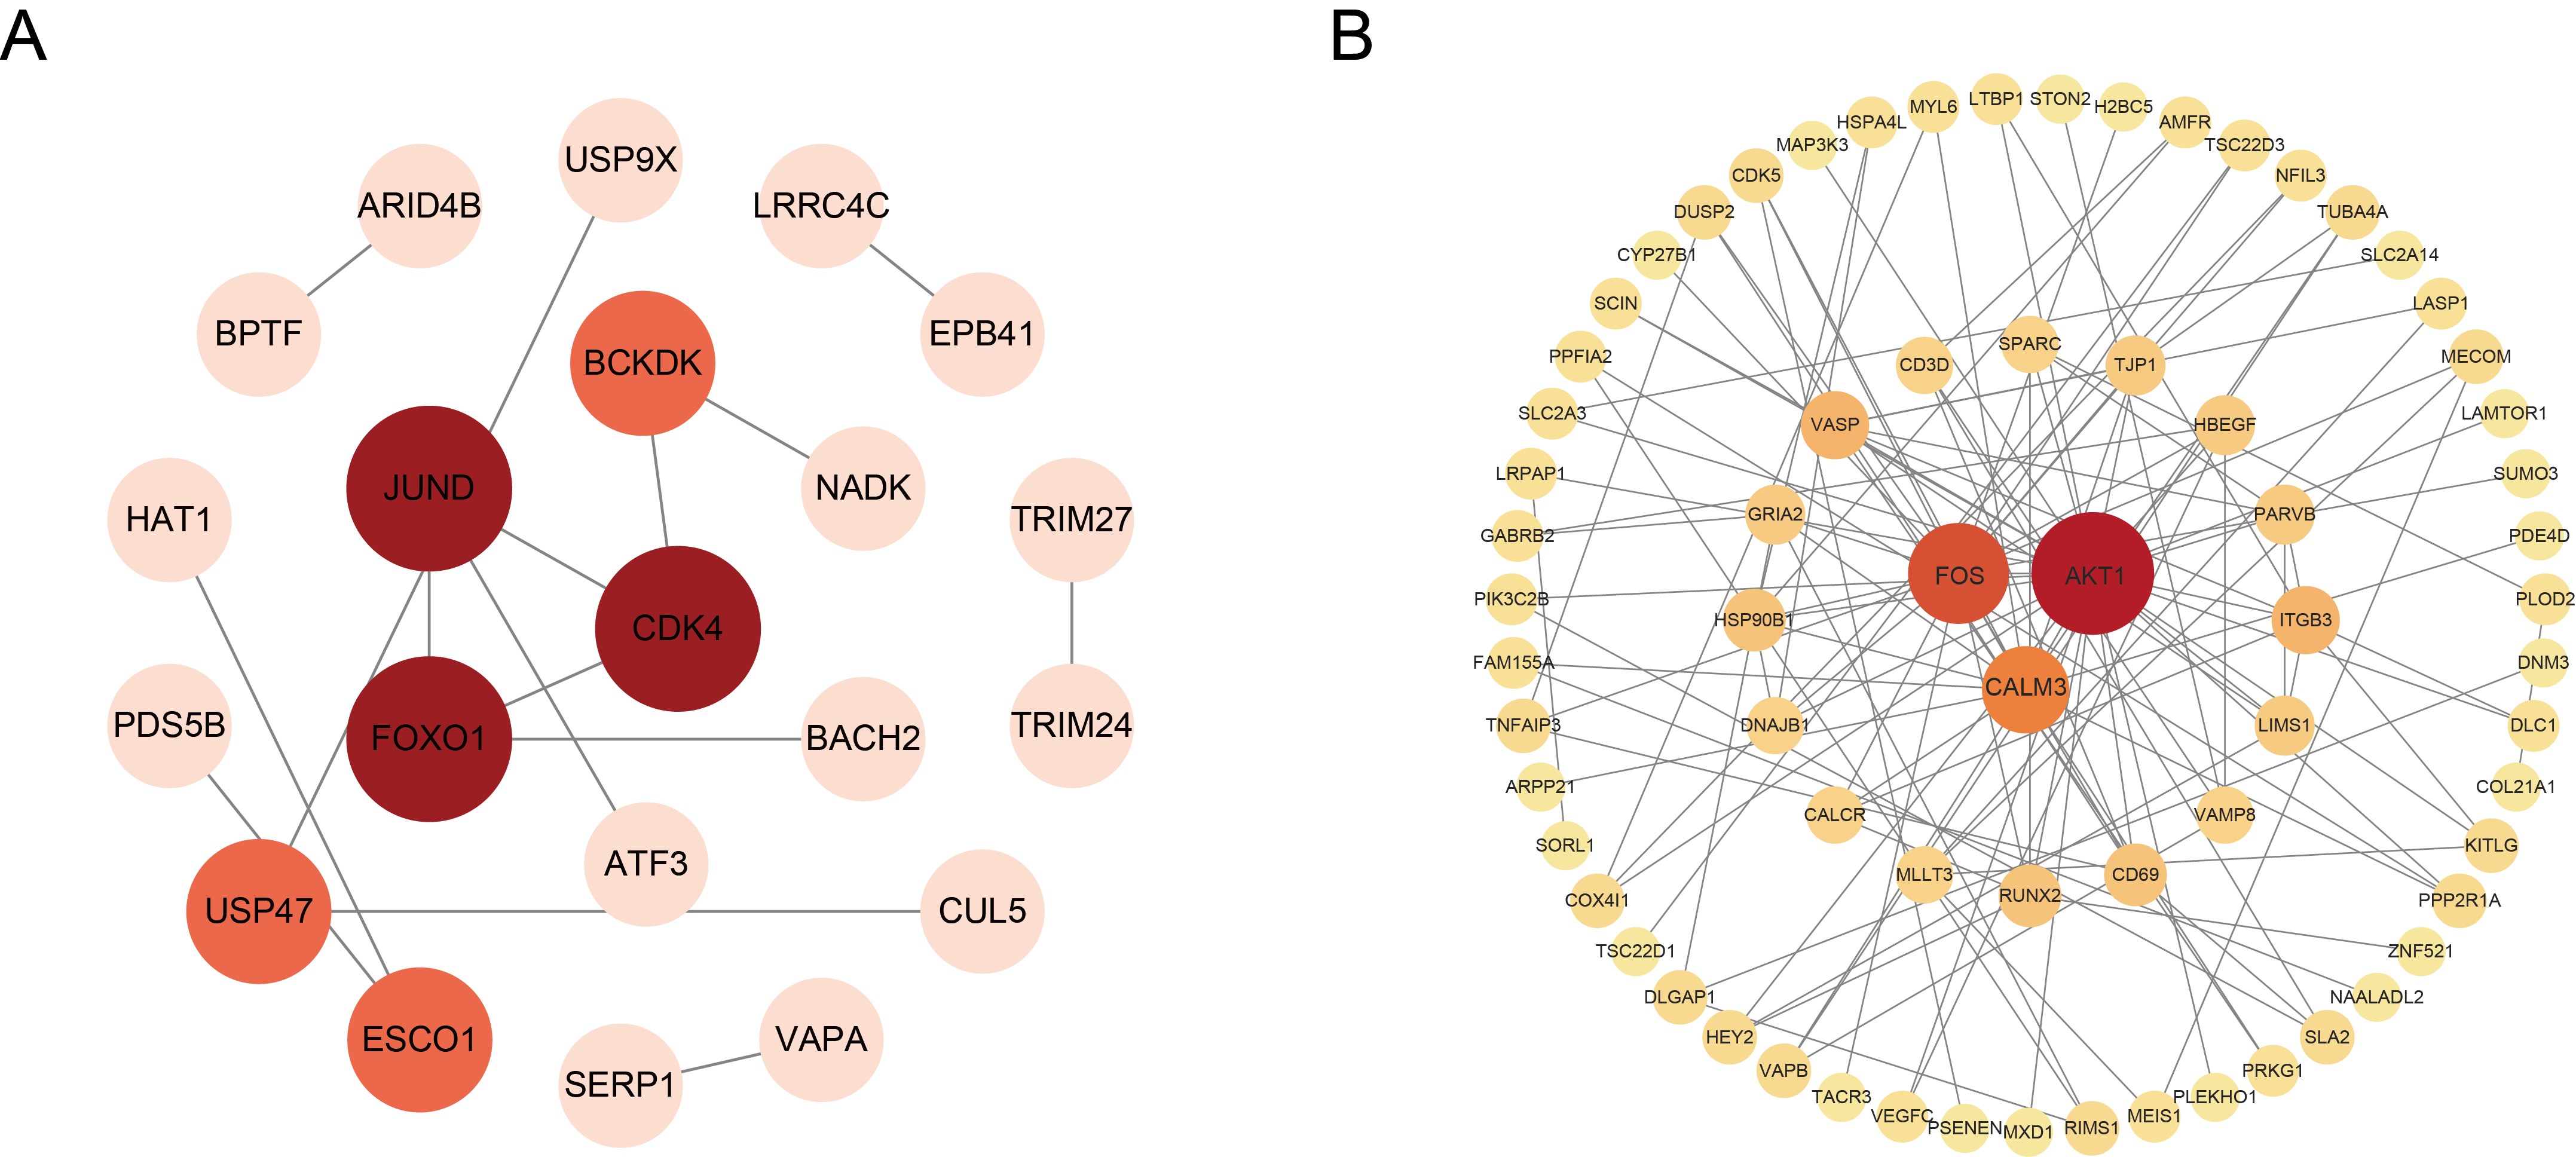


Supplementary Figure S4: Protein-protein interaction (PPI) plot of differentially expressed genes from microRNA expression data. (A) PPI map of differential genes in BHS psoriasis and healthy control groups. (B) PPI map of differential genes in BSS psoriasis and healthy control groups.


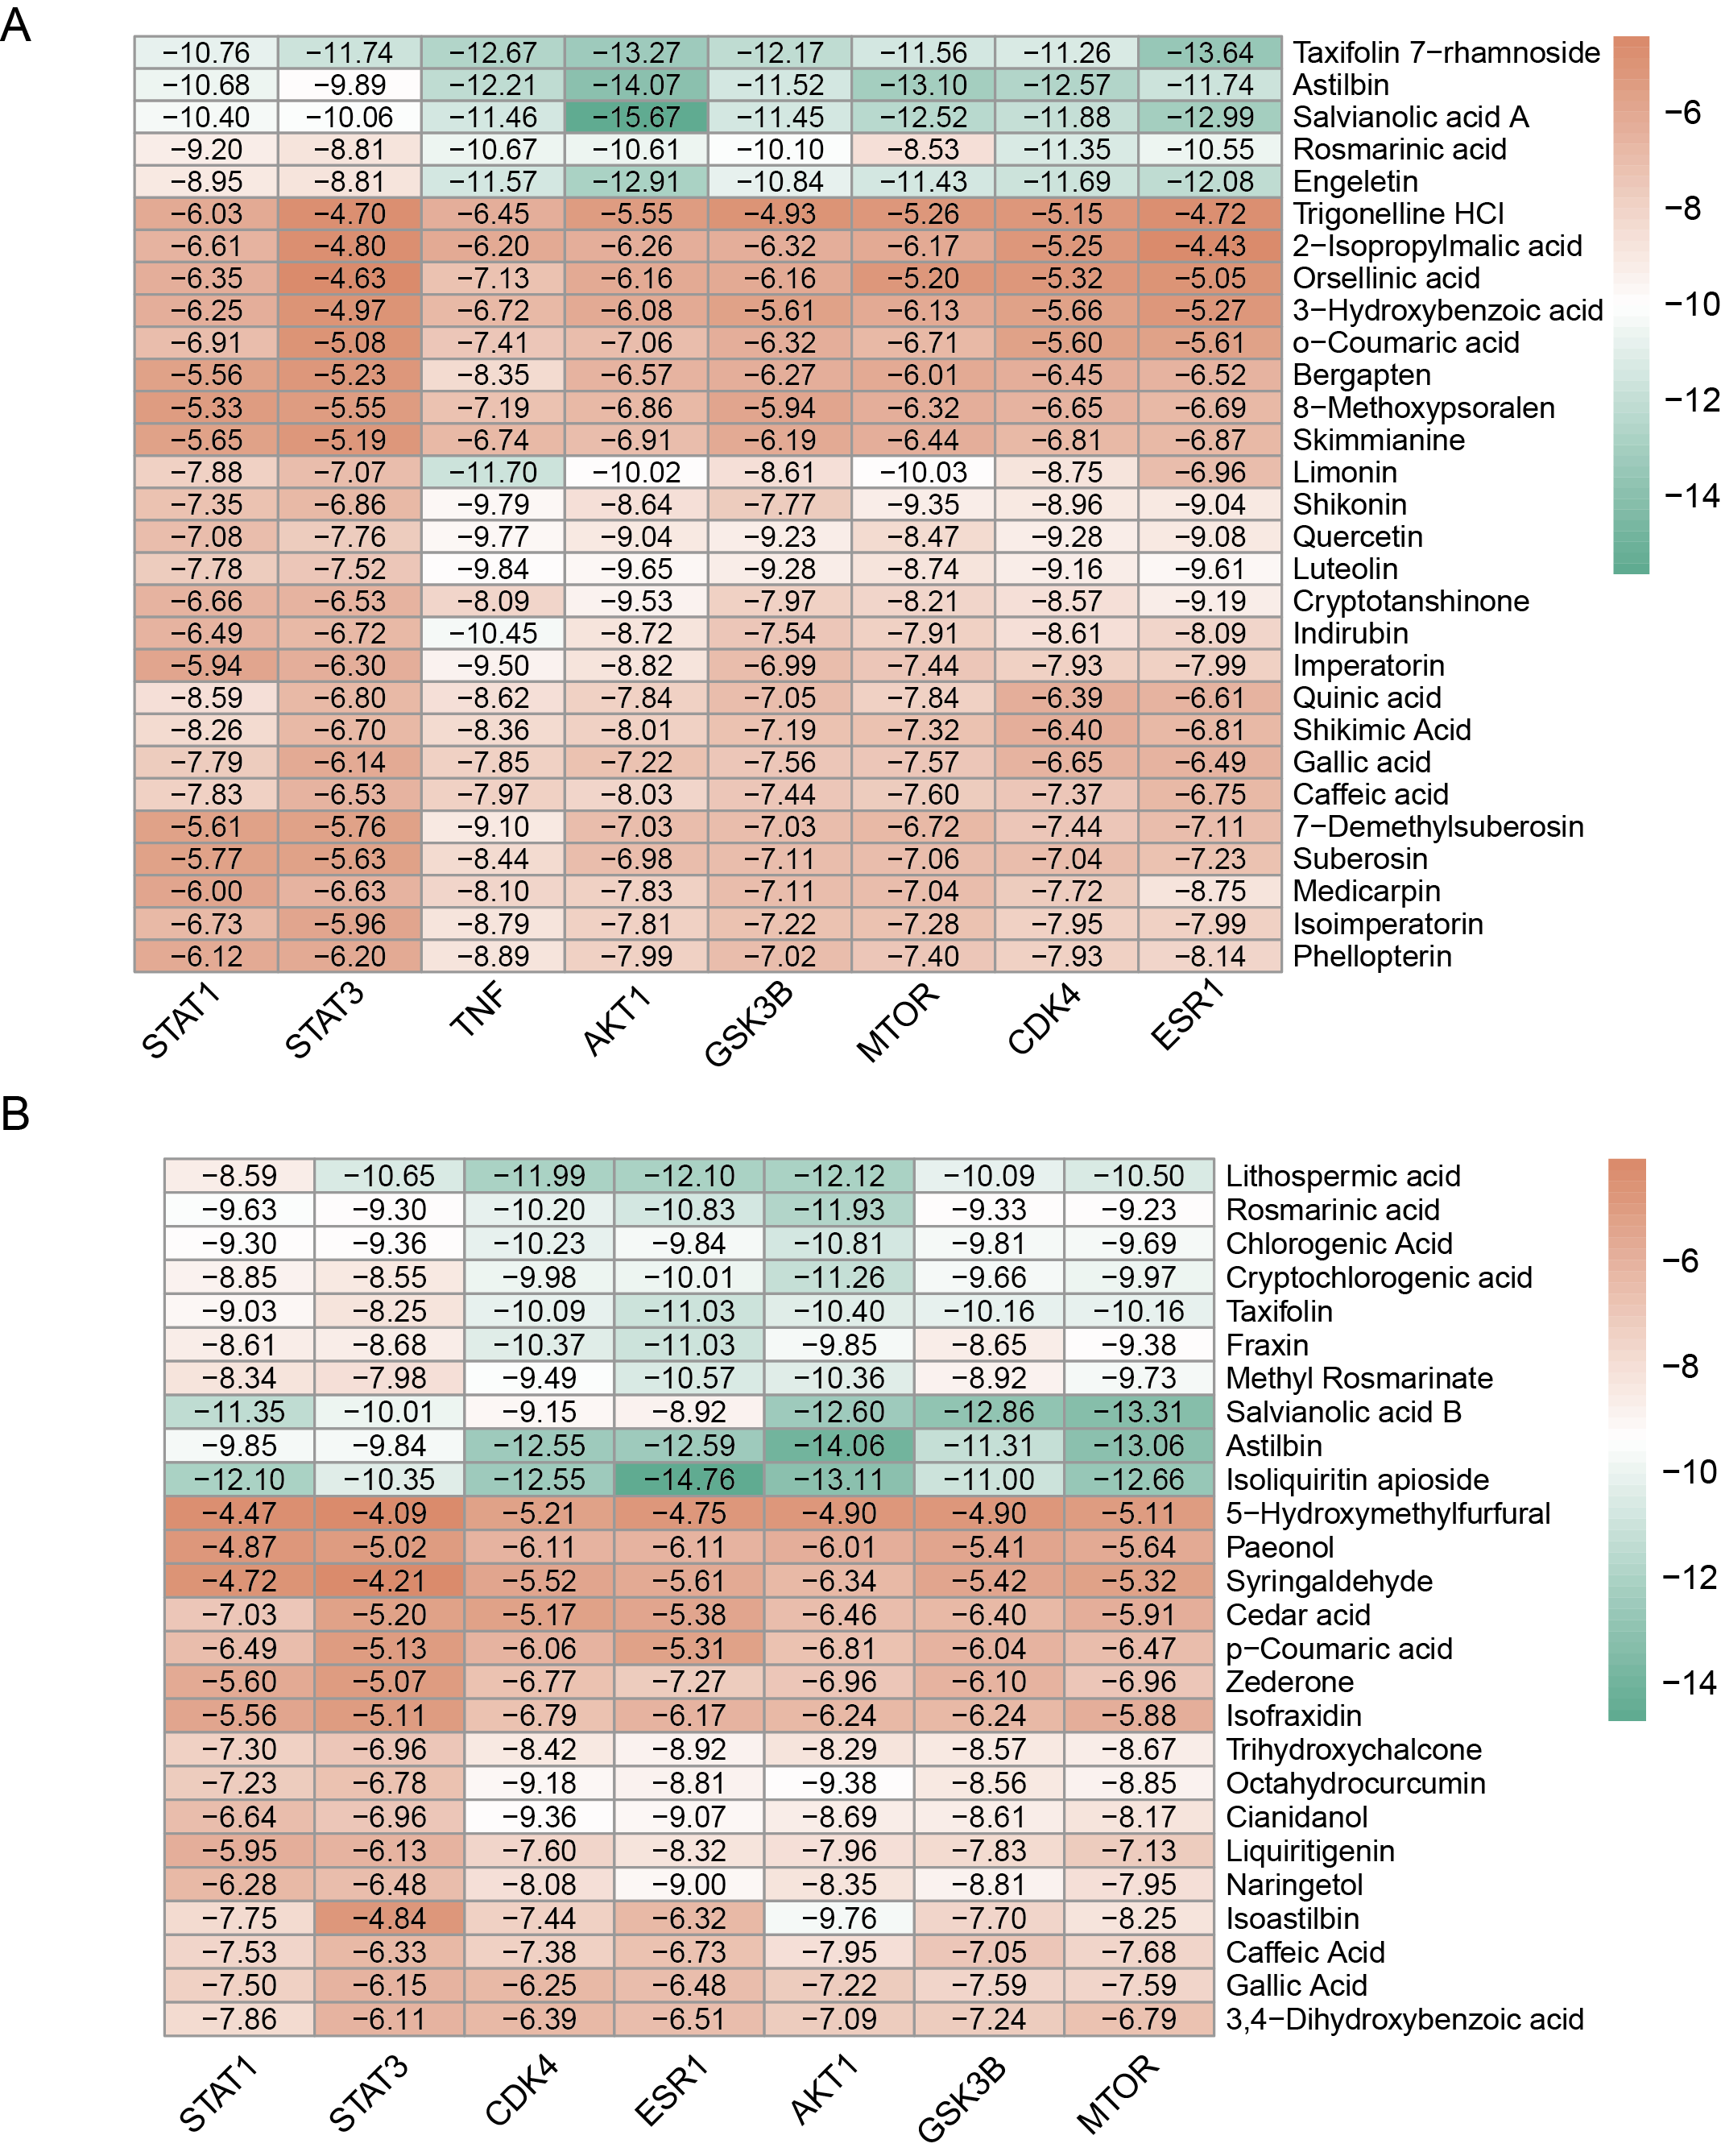


Supplementary Figure S5: Binding energy (kal/mol) heatmaps of the main components of two compounds for molecular docking with core psoriasis targets. (A) Binding energy of 29 components of CQC and 8 core targets. (B) Binding energy of 26 main active components and 7 core targets of PSORI-CM01.


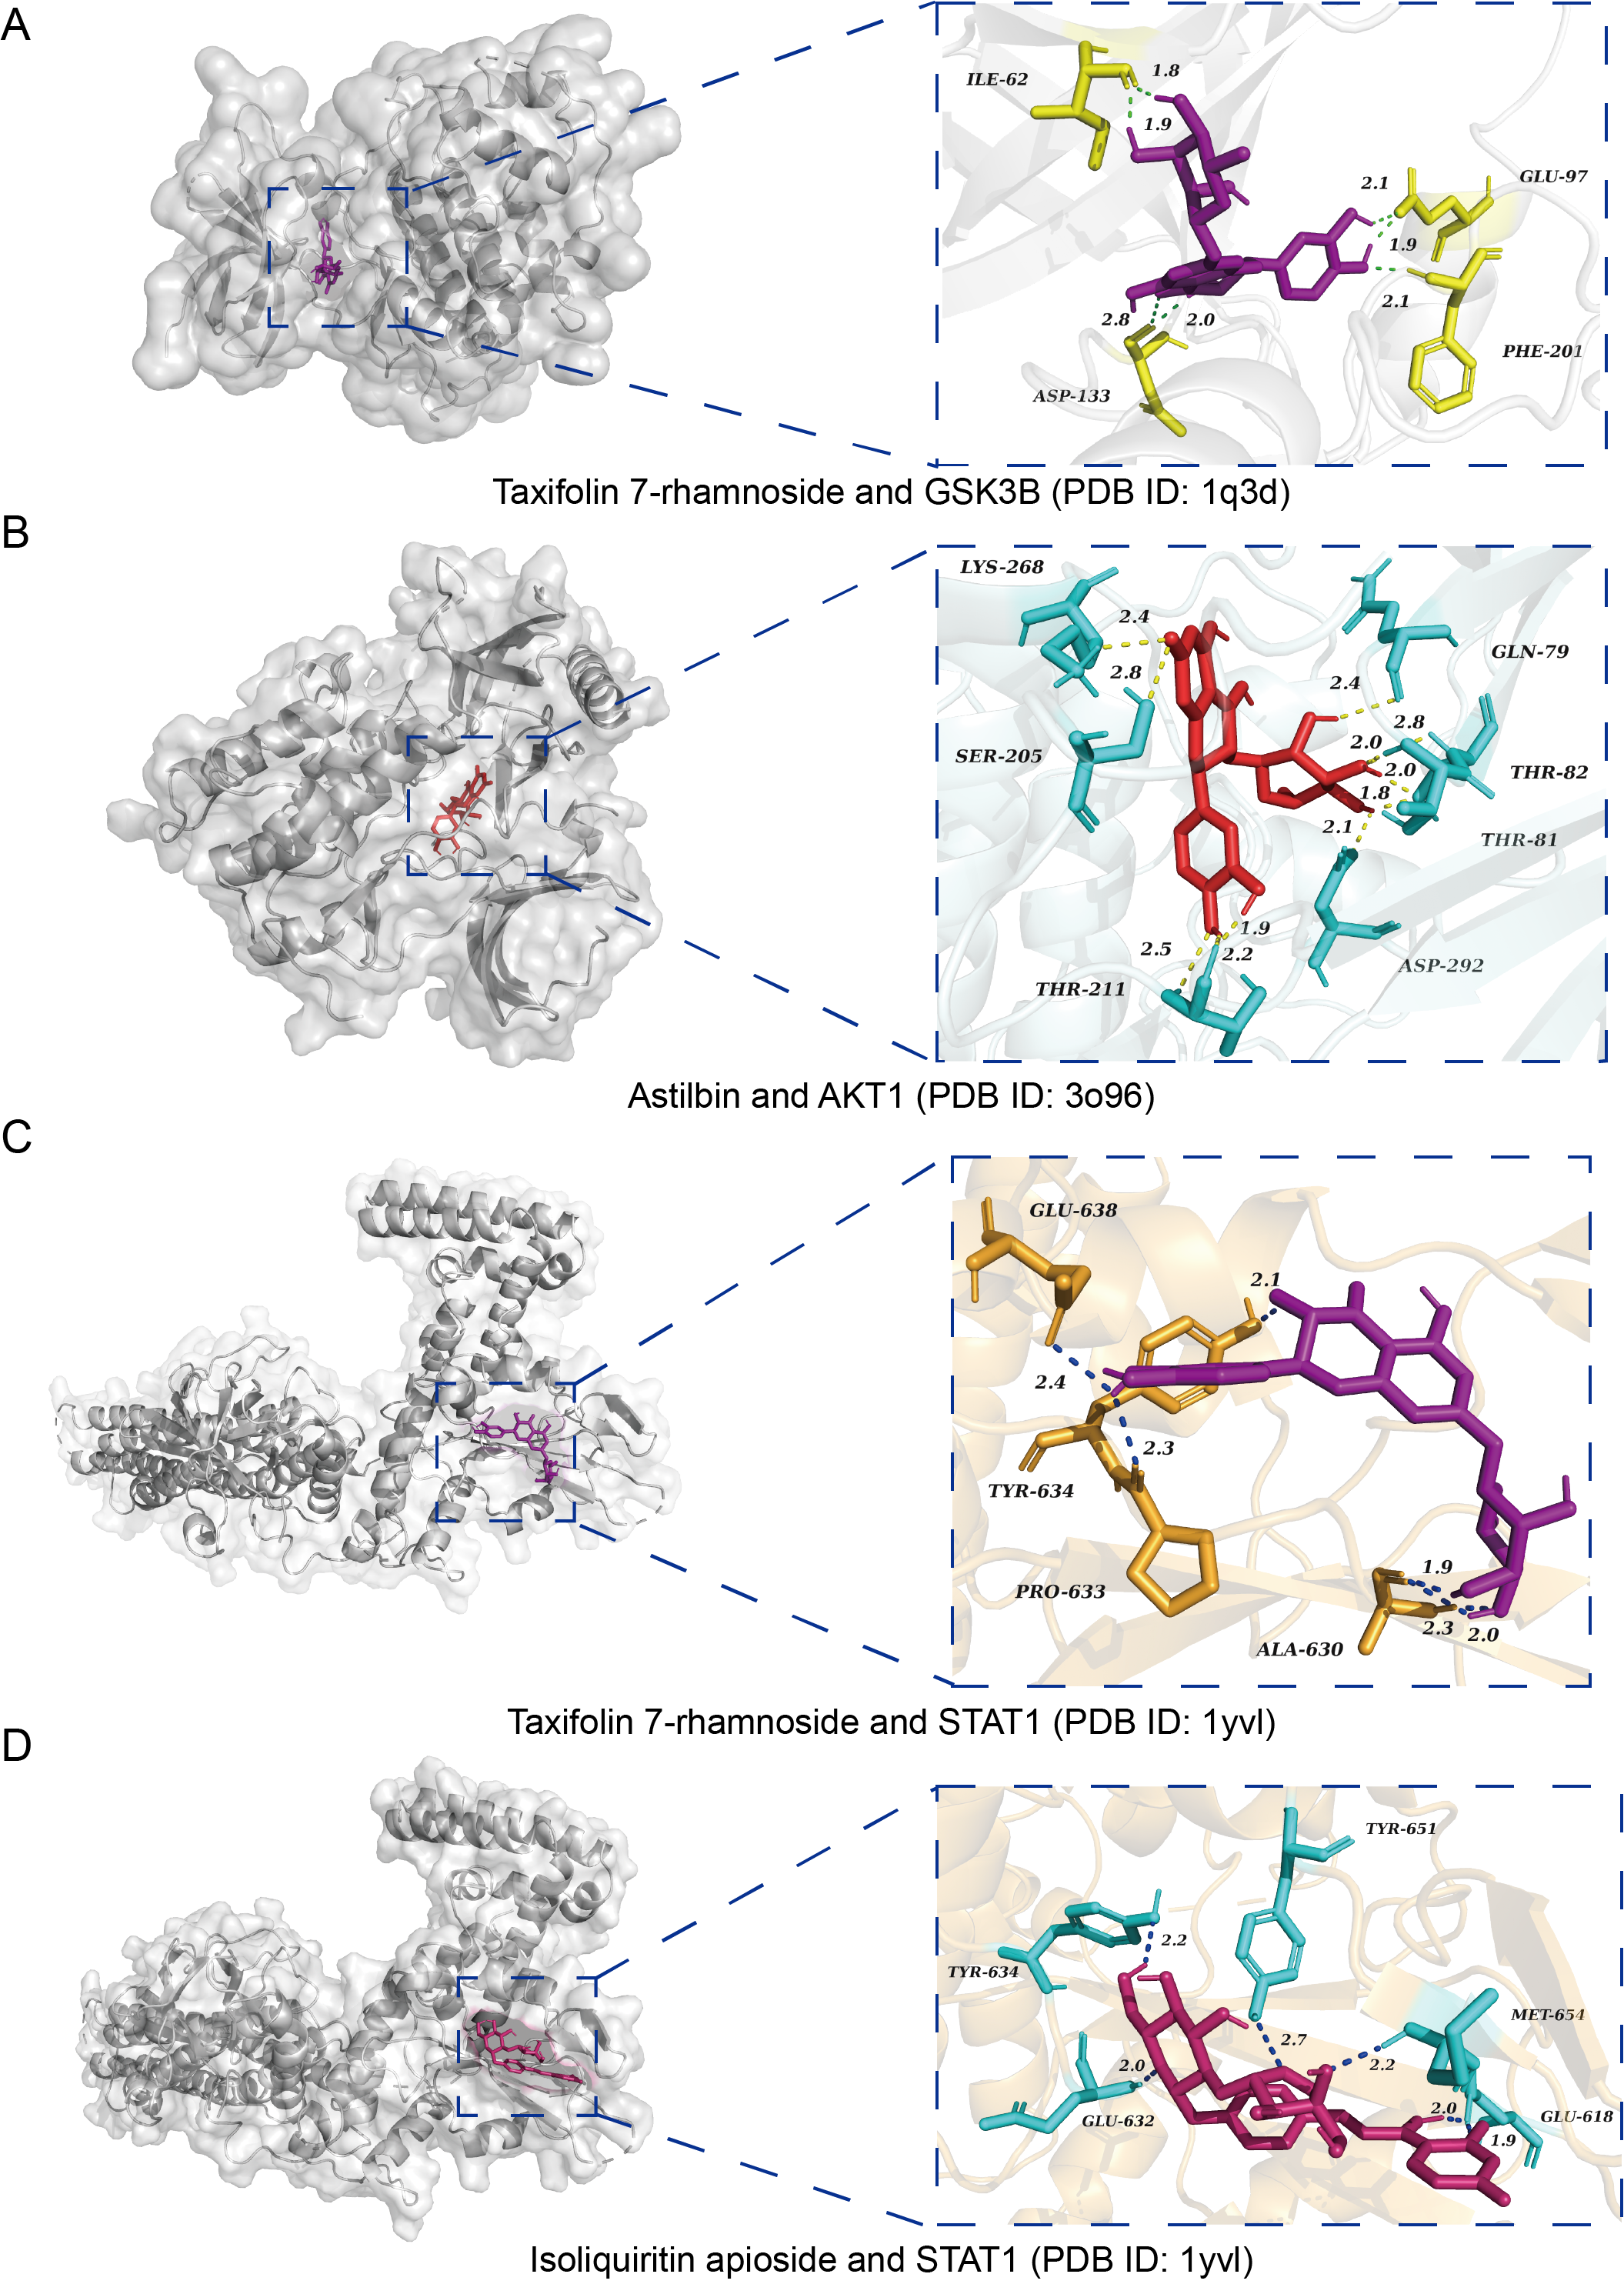


Supplementary Figure S6: 3D view of molecular docking display. (A) view of Taxifolin 7-rhamnoside and GSK3B protein after docking. (B) 3D view of Astilbin and AKT1 protein after docking. (C) 3D view of Taxifolin 7-rhamnoside and STAT1 protein after docking. (D) 3D view of Isoliquiritin apioside and STAT1 protein after docking.


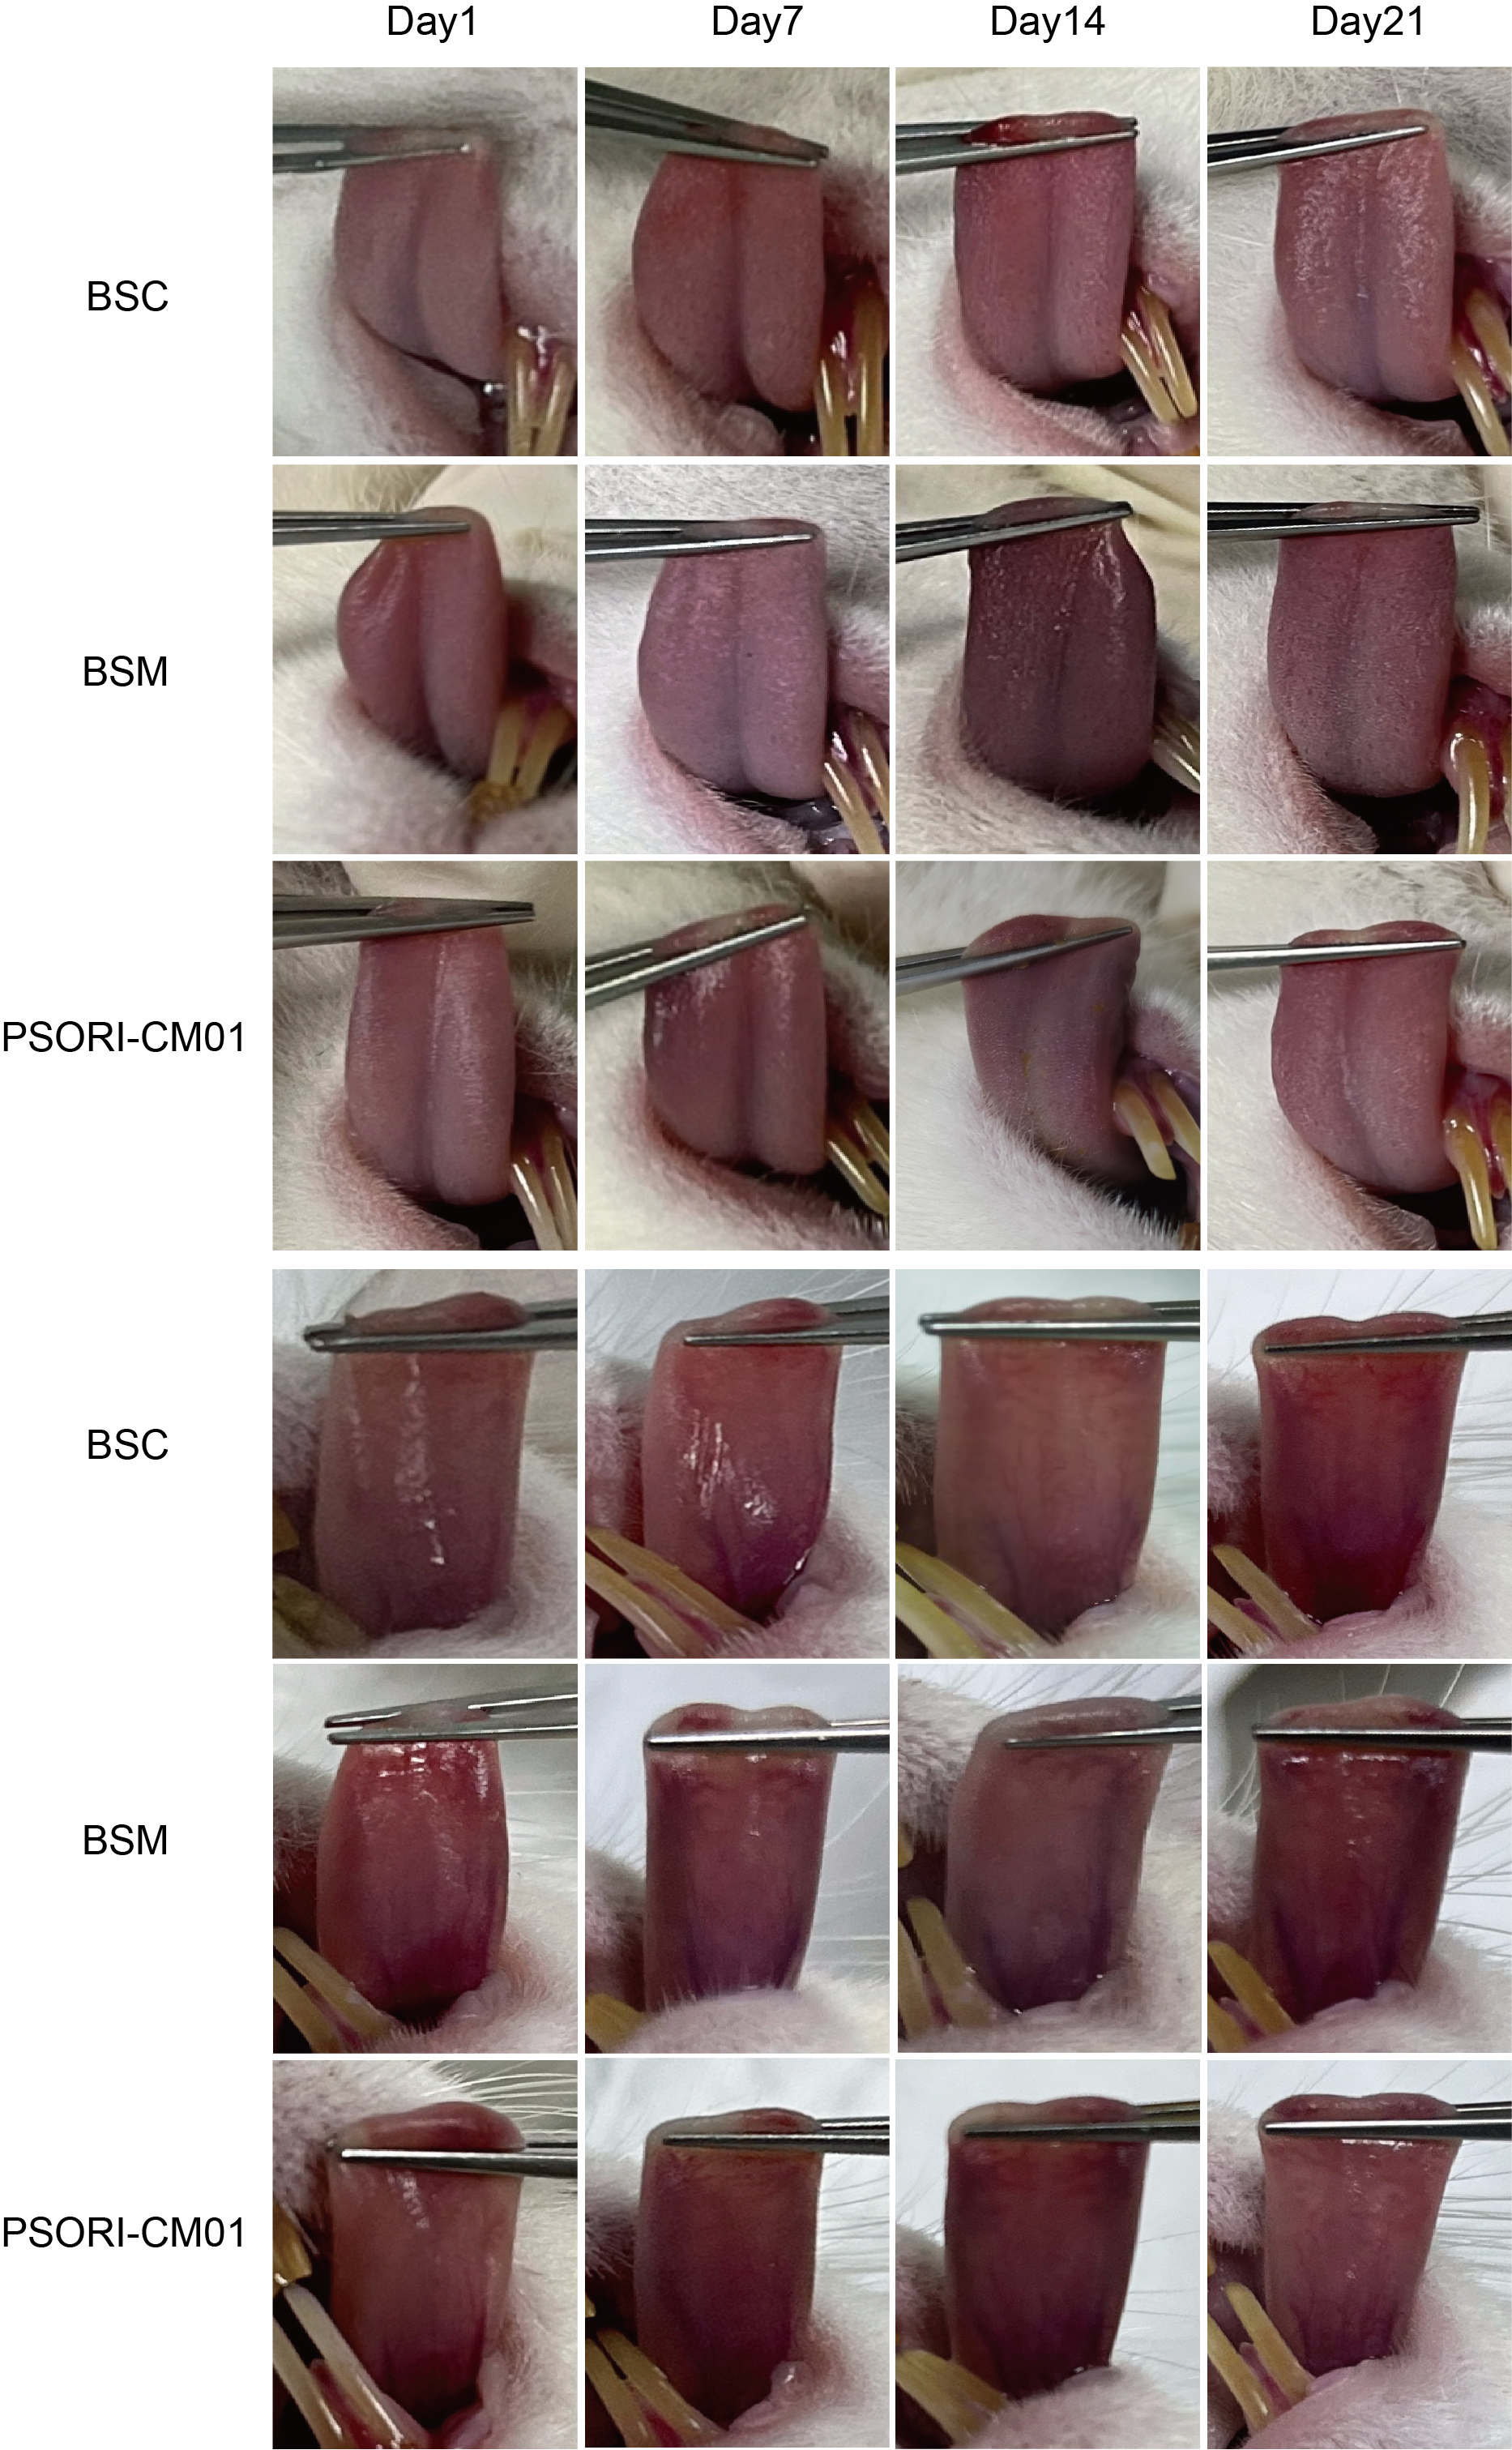


Supplementary Figure S7: Changes of tongue and sublingual vein in three groups of BSS psoriasis.
